# Supplementary material
Source: PubMed Central journal article supplement (PMC9192793)
Supplement: mmc1.pdf [file mmc1.pdf]

## Appendices

### Appendix 1. Search strategy

#### MEDLINE search

("coronavirus"[MeSH] OR "coronavirus infections"[MeSH Terms] OR "coronavirus"[All Fields] OR "covid 2019"[All Fields] OR "SARS2"[All Fields] OR "SARS-CoV-2"[All Fields] OR "SARS-CoV-19"[All Fields] OR "severe acute respiratory syndrome coronavirus 2" [supplementary concept] OR "coronavirus infection"[All Fields] OR "severe acute respiratory pneumonia outbreak"[All Fields] OR "novel cov"[All Fields] OR "2019ncov"[All Fields] OR "sars cov2"[All Fields] OR "cov22"[All Fields] OR "ncov"[All Fields] OR "covid-19"[All Fields] OR "covid19"[All Fields] OR "coronaviridae"[All Fields] OR "corona virus"[All Fields])

AND

("Immunization"[Mesh] OR "Immunotherapy"[Mesh] OR "Vaccination"[Mesh] OR "Mass Vaccination"[Mesh] OR "Immunization Programs"[Mesh] OR ((immunization OR immunisation OR vaccinat\*) AND (program\* OR rate\*)) OR vaccinat\* OR revaccinat\* OR immunization OR immunization OR "Disease Outbreaks/prevention and control"[Mesh])

AND

(Acceptance OR willingness OR adherence OR uptake OR barrier\* OR facilitator\* OR "Health Knowledge, Attitudes, Practice"[MeSH] OR "Patient Acceptance of Health Care "[ MeSH] OR "Vaccination/psychology"[MeSH])

#### Cochrane databases search

(vaccin\* OR immunizat\*)

AND

(Acceptance OR willingness OR adherence OR uptake OR barrier\* OR facilitator\*)

Appendix 2. PRISMA flow diagram

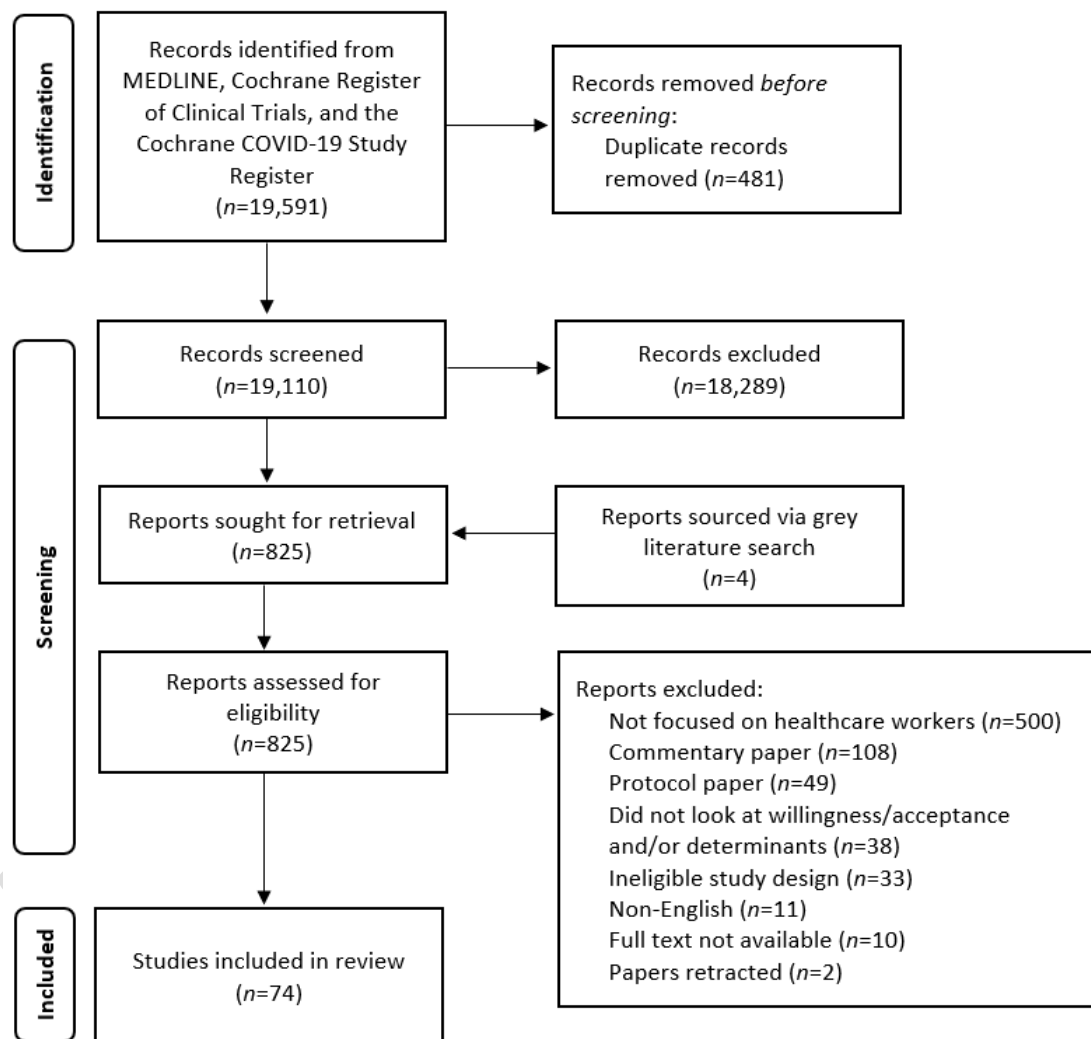

**Appendix 3. Evidence of COVID-19 vaccination acceptance among healthcare workers (HCWs) (number of studies [k]=74)**

| Author                                                                                 | Publication status | Country          | Design | Sample                                        | Sample size | Data collection period | Mean % vaccine acceptance | TDF domains                                                                                                         |
|----------------------------------------------------------------------------------------|--------------------|------------------|--------|-----------------------------------------------|-------------|------------------------|---------------------------|---------------------------------------------------------------------------------------------------------------------|
| <b>North American studies (k=23), listed in order of end of data collection period</b> |                    |                  |        |                                               |             |                        |                           |                                                                                                                     |
| Manning et al.                                                                         | Published          | USA              | CS     | HCWs (nurse faculty and student nurses)       | 1,212       | Aug 10 - Sep 14, 2020  | 50%                       | <i>Beliefs about consequences</i>                                                                                   |
| Lucia et al.                                                                           | Published          | USA              | CS     | HCWs (medical students)                       | 168         | Sep 14-30, 2020        | 77%                       | <i>Social influences<br/>Beliefs about consequences</i>                                                             |
| Gadoth et al.                                                                          | Preprint           | USA              | CS     | HCWs (non-physicians)                         | 609         | Sep 24 - Oct 16, 2020  | 32%                       | <i>Environmental context and resources<br/>Social/professional role and identity<br/>Beliefs about consequences</i> |
| Verger et al.*                                                                         | Published          | Canada data only | CS     | HCWs                                          | 1,055       | Oct-Nov, 2020          | 45%                       | <i>Social influences<br/>Beliefs about consequences<br/>Reinforcement</i>                                           |
| Shekhar et al.                                                                         | Published          | USA              | CS     | HCWs                                          | 3,479       | Oct 7 - Nov 9, 2020    | 36%                       | <i>Social/professional role and identity<br/>Beliefs about consequences</i>                                         |
| Unroe et al.                                                                           | Published          | USA              | CS     | HCWs (nursing home and assisted living staff) | 8,243       | Nov 14-17, 2020        | 45%                       | <i>Social/professional role and identity<br/>Beliefs about consequences</i>                                         |
| Mascarenhas et al.                                                                     | Published          | USA              | CS     | HCWs (dental students)                        | 245         | Dec, 2020              | 56%                       | <i>Social influences<br/>Beliefs about consequences</i>                                                             |

Behavioural determinants of COVID-19 vaccination acceptance among healthcare workers: a rapid review

|                      |                    |                          |      |                                       |        |                      |                          |                                                                                                                                                    |
|----------------------|--------------------|--------------------------|------|---------------------------------------|--------|----------------------|--------------------------|----------------------------------------------------------------------------------------------------------------------------------------------------|
| SafeCare-BC          | Published (report) | British Columbia, Canada | CS   | HCWs (continuing care workers)        | 1,503  | Dec, 2020            | 57%                      | <i>Social influences<br/>Social/professional role and identity<br/>Beliefs about consequences<br/>Beliefs about capabilities<br/>Reinforcement</i> |
| Shaw et al.          | Published          | USA                      | CS   | HCWs                                  | 5,287  | Nov 23 - Dec 5, 2020 | 58%                      | <i>Social/professional role and identity<br/>Beliefs about consequences</i>                                                                        |
| Kuter et al.         | Published          | USA                      | CS   | HCWs                                  | 12,034 | Nov 13 - Dec 6, 2020 | 64%                      | <i>Knowledge<br/>Social/professional role and identity<br/>Beliefs about consequences<br/>Reinforcement</i>                                        |
| Jain et al.          | Preprint           | USA                      | CS   | HCWs                                  | 2,135  | Nov 16 - Dec 8, 2020 | 69%                      | <i>Beliefs about consequences</i>                                                                                                                  |
| Meyer et al.         | Published          | USA                      | CS   | HCWs                                  | 16,158 | Dec 4-22, 2020       | 53-80%                   | <i>Beliefs about consequences</i>                                                                                                                  |
| Harrison et al.      | Published          | USA                      | Qual | HCWs (skilled nursing facility staff) | 58     | Dec 17-23, 2020      | Not reported (Qual data) | <i>Knowledge<br/>Social influences<br/>Beliefs about consequences</i>                                                                              |
| Dzieciolowska et al. | Published          | Canada                   | CS   | HCWs                                  | 2,761  | Dec 15-28, 2020      | 81%                      | <i>Social/professional role and identity</i>                                                                                                       |
| Canadian PSW Network | Published (report) | Canada                   | CS   | HCWs (personal support workers)       | 562    | Jan 5, 2021          | 64%                      | <i>Knowledge</i>                                                                                                                                   |

Behavioural determinants of COVID-19 vaccination acceptance among healthcare workers: a rapid review

|                                |                    |                 |      |                               |                               |                             |                           |                                                                                                                                       |
|--------------------------------|--------------------|-----------------|------|-------------------------------|-------------------------------|-----------------------------|---------------------------|---------------------------------------------------------------------------------------------------------------------------------------|
| Desveaux et al.                | Preprint           | Ontario, Canada | CS   | HCWs (non-physicians)         | 8,634                         | Jan 4-12, 2021              | 80%                       | <i>Environmental context and resources<br/>Social/professional role and identity<br/>Beliefs about consequences<br/>Reinforcement</i> |
| Grumbach et al.                | Published          | USA             | CS   | Gen pub & HCWs samples        | 3,161 (Gen pub); 1,803 (HCWs) | Nov 27, 2020 - Jan 15, 2021 | 66% (Gen pub); 84% (HCWs) | <i>Social influences<br/>Beliefs about consequences</i>                                                                               |
| Berry et al.                   | Published          | USA             | Qual | HCWs                          | 193                           | Dec 30, 2020 - Jan 15, 2021 | Not reported (Qual data)  | <i>Beliefs about consequences</i>                                                                                                     |
| Kociolek et al.                | Published          | USA             | CS   | HCWs                          | 4,448                         | Dec 21, 2020 - Jan 13, 2021 | 59%                       | <i>Social/professional role and identity<br/>Beliefs about consequences</i>                                                           |
| Ontario College of Pharmacists | Published (report) | Canada          | CS   | HCWs (pharmacy professionals) | 6,677                         | Jan 12-21, 2021             | 79%                       | <i>Social/professional role and identity<br/>Beliefs about consequences</i>                                                           |
| McCabe et al.                  | Preprint           | USA             | CS   | Gen pub (inc. HCWs)           | 34,470                        | Dec 4, 2020 - Feb 9, 2021   | 81%                       | <i>Social/professional role and identity</i>                                                                                          |
| Moniz et al.                   | Preprint           | USA             | CS   | HCWs                          | 11,387                        | Feb 1-15, 2021              | 85%                       | <i>Social/professional role and identity<br/>Reinforcement</i>                                                                        |

Behavioural determinants of COVID-19 vaccination acceptance among healthcare workers: a rapid review

|                                                                                           |                           |                |               |                             |                    |                               |                                  |                                                                                                                     |
|-------------------------------------------------------------------------------------------|---------------------------|----------------|---------------|-----------------------------|--------------------|-------------------------------|----------------------------------|---------------------------------------------------------------------------------------------------------------------|
| King et al.                                                                               | Preprint                  | USA            | Coh           | Gen pub (inc. HCWs)         | 732,308            | Jan 6 - Mar 31, 2021          | 86%                              | <i>Social/professional role and identity</i>                                                                        |
| <b>Author</b>                                                                             | <b>Publication status</b> | <b>Country</b> | <b>Design</b> | <b>Sample</b>               | <b>Sample size</b> | <b>Data collection period</b> | <b>Mean % vaccine acceptance</b> | <b>TDF domains</b>                                                                                                  |
| <b>Rest-of-the-world studies (k=52), listed in order of end of data collection period</b> |                           |                |               |                             |                    |                               |                                  |                                                                                                                     |
| Papagiannis et al.                                                                        | Published                 | Greece         | CS            | HCWs                        | 461                | Feb 10-25, 2020               | 43%                              | <i>Social/professional role and identity</i>                                                                        |
| Zigron et al.                                                                             | Published                 | Israel         | CS            | HCWs (dental professionals) | 506                | Mar - Apr, 2020               | 85%                              | <i>Social/professional role and identity</i>                                                                        |
| Fu et al.                                                                                 | Preprint                  | China          | CS            | HCWs                        | 352                | Mar 17-18, 2020               | 76%                              | <i>Social influences<br/>Beliefs about consequences</i>                                                             |
| Wang et al.                                                                               | Published                 | Hong Kong      | CS            | HCWs (nurses)               | 806                | Feb 26 - Mar 31, 2020         | 40%                              | <i>Social/professional role and identity<br/>Beliefs about consequences<br/>Reinforcement</i>                       |
| Dror et al.                                                                               | Published                 | Israel         | CS            | Gen pub (inc. HCWs)         | 829                | Mar 26 - Apr 9, 2020          | 61-78%                           | <i>Environmental context and resources<br/>Social/professional role and identity<br/>Beliefs about consequences</i> |

Behavioural determinants of COVID-19 vaccination acceptance among healthcare workers: a rapid review

|                       |           |                              |    |                           |       |                       |                         |                                                                                                           |
|-----------------------|-----------|------------------------------|----|---------------------------|-------|-----------------------|-------------------------|-----------------------------------------------------------------------------------------------------------|
| Fouogue et al.        | Preprint  | Cameroon                     | CS | HCWs                      | 464   | Apr 14-29, 2020       | 49%                     | <i>Social influences<br/>Beliefs about consequences</i>                                                   |
| Kwok et al.           | Published | Hong Kong                    | CS | HCWs (nurses)             | 1,205 | Mar - Apr, 2020       | 63%                     | <i>Social/professional role and identity<br/>Beliefs about consequences<br/>Emotion</i>                   |
| Nzaji et al.          | Published | Democratic Republic of Congo | CS | HCWs                      | 613   | Mar 20 - Apr 30, 2020 | 28%                     | <i>Social/professional role and identity<br/>Beliefs about consequences</i>                               |
| Gagneux-Brunon et al. | Published | France                       | CS | HCWs                      | 2,047 | Mar 26 - Jul 2, 2020  | 77%                     | <i>Social/professional role and identity<br/>Beliefs about consequences<br/>Reinforcement<br/>Emotion</i> |
| Wang et al.           | Published | China                        | CS | HCWs                      | 3,726 | Sep 15-20, 2020       | 79%                     | <i>Social/professional role and identity<br/>Beliefs about consequences</i>                               |
| Kose et al.           | Published | Turkey                       | CS | HCWs                      | 1,138 | Sep 17-20, 2020       | 69%                     | <i>Beliefs about consequences<br/>Reinforcement</i>                                                       |
| Maltezou et al.       | Published | Greece                       | CS | HCWs                      | 1,521 | Sep 1 - Oct 31, 2020  | 51%                     | <i>Social/professional role and identity<br/>Reinforcement</i>                                            |
| Verger et al.*        | Published | France and Belgium data only | CS | HCWs                      | 1,623 | Oct-Nov, 2020         | 46%                     | <i>Social influences<br/>Beliefs about consequences<br/>Reinforcement</i>                                 |
| She et al.            | Published | China                        | CS | HCWs (doctors and nurses) | 2,064 | Oct - Nov, 2020       | 75% doctors, 68% nurses | <i>Social influences<br/>Beliefs about capabilities<br/>Emotion</i>                                       |

Behavioural determinants of COVID-19 vaccination acceptance among healthcare workers: a rapid review

|                    |           |              |    |                       |       |                      |                                               |                                                                                                                                                         |
|--------------------|-----------|--------------|----|-----------------------|-------|----------------------|-----------------------------------------------|---------------------------------------------------------------------------------------------------------------------------------------------------------|
| Yu et al.          | Published | China        | CS | HCWs                  | 2,254 | Oct - Nov, 2020      | 75% nurses;<br>68% doctors                    | <i>Environmental context and resources</i><br><i>Social influences</i><br><i>Beliefs about consequences</i><br><i>Beliefs about capabilities</i>        |
| Di Gennaro et al.  | Published | Italy        | CS | HCWs                  | 1,723 | Oct 1 – Nov 1 2020   | 67%                                           | <i>Environmental context and resources</i><br><i>Social/professional role and identity</i><br><i>Reinforcement</i>                                      |
| Temsah et al.      | Preprint  | Saudi Arabia | CS | HCWs                  | 2,007 | Nov 1-12, 2020       | 9-24% (depending on type of COVID-19 vaccine) | <i>Beliefs about consequences</i>                                                                                                                       |
| Barry et al.       | Preprint  | Saudi Arabia | CS | HCWs                  | 1,512 | Nov 4-14, 2020       | 70%                                           | <i>Environmental context and resources</i><br><i>Beliefs about consequences</i>                                                                         |
| Gönüllü et al.     | Published | Turkey       | CS | HCWs (paediatricians) | 506   | Nov 1-15, 2020       | 83%                                           | <i>Social/professional role and identity</i><br><i>Beliefs about consequences</i>                                                                       |
| Di Giuseppe et al. | Published | Italy        | CS | HCWs                  | 811   | Sep 14- Nov 30, 2020 | 81%                                           | <i>Environmental context and resources</i><br><i>Social/professional role and identity</i><br><i>Beliefs about consequences</i><br><i>Reinforcement</i> |
| Ledda et al.       | Published | Italy        | CS | HCWs                  | 787   | Sep - Dec, 2020      | 75%                                           | <i>Knowledge</i><br><i>Beliefs about consequences</i>                                                                                                   |



Behavioural determinants of COVID-19 vaccination acceptance among healthcare workers: a rapid review

|                          |           |                   |    |                             |       |                 |     |                                                                                                                                                             |
|--------------------------|-----------|-------------------|----|-----------------------------|-------|-----------------|-----|-------------------------------------------------------------------------------------------------------------------------------------------------------------|
| Castañeda-Vasquez et al. | Published | Mexico            | CS | HCWs                        | 43    | Oct - Dec, 2020 | 94% | <i>Social/professional role and identity</i>                                                                                                                |
| Kaplan et al.            | Published | Turkey            | CS | HCWs                        | 1,574 | Dec, 2020       | 85% | <i>Social influences<br/>Beliefs about consequences<br/>Reinforcement<br/>Emotion</i>                                                                       |
| Patelarou et al.         | Preprint  | Multiple (Europe) | CS | HCWs (nursing students)     | 2,249 | Dec, 2020       | 44% | <i>Knowledge<br/>Social influences<br/>Beliefs about consequences<br/>Reinforcement<br/>Emotion</i>                                                         |
| Karagiannidis et al.     | Published | Germany           | CS | HCWs (intensive care staff) | 2,305 | Dec 3-12, 2020  | 64% | <i>Beliefs about consequences</i>                                                                                                                           |
| Qattan et al.            | Published | Saudi Arabia      | CS | HCWs                        | 673   | Dec 8-14, 2020  | 51% | <i>Social/professional role and identity<br/>Beliefs about consequences<br/>Reinforcement</i>                                                               |
| Raftopoulos et al.       | Published | Greece & Cyprus   | CS | HCWs                        | 2,238 | Dec 1-15, 2020  | 48% | <i>Social influences<br/>Social/professional role and identity</i>                                                                                          |
| Al-Metwali et al.        | Published | Iraq              | CS | Gen pub (inc. HCWs)         | 1,680 | Dec 1-19, 2020  | 62% | <i>Environmental context and resources<br/>Social influences<br/>Social/professional role and identity<br/>Beliefs about consequences<br/>Reinforcement</i> |
| Yigit et al.             | Published | Turkey            | CS | HCWs                        | 343   | Dec 15-20, 2020 | 55% | <i>Social/professional role and identity<br/>Beliefs about consequences</i>                                                                                 |

Behavioural determinants of COVID-19 vaccination acceptance among healthcare workers: a rapid review

|                    |           |                 |    |                        |                            |                       |                            |                                                                                                                     |
|--------------------|-----------|-----------------|----|------------------------|----------------------------|-----------------------|----------------------------|---------------------------------------------------------------------------------------------------------------------|
| Abuown et al.      | Published | UK              | CS | HCWs                   | 514                        | Dec 1-21, 2020        | 59%                        | <i>Beliefs about consequences<br/>Reinforcement</i>                                                                 |
| Chew et al.        | Published | Multiple (Asia) | CS | HCWs                   | 1,720                      | Dec 12-21, 2020       | 96%                        | <i>Social/professional role and identity<br/>Beliefs about consequences</i>                                         |
| Bauernfeind et al. | Published | Germany         | CS | HCWs                   | 2,454                      | Dec 12-21, 2020       | 60%                        | <i>Social/professional role and identity<br/>Reinforcement</i>                                                      |
| Petravić et al.    | Published | Slovenia        | CS | Gen pub (inc. HCWs)    | 12,042 (2,068 were HCWs)   | Dec 17-27 2020        | 59%                        | <i>Social influences<br/>Social/professional role and identity<br/>Beliefs about consequences<br/>Reinforcement</i> |
| Kukreti et al.     | Published | Taiwan          | CS | HCWs & patient samples | 500 (HCWs); 238 (patients) | Sep 24 - Dec 31, 2020 | 23% (HCWs); 31% (patients) | <i>Beliefs about consequences<br/>Reinforcement</i>                                                                 |
| Youssef et al.     | Preprint  | Lebanon         | CS | HCWs                   | 1,800                      | Dec 10-31, 2020       | 58%                        | <i>Knowledge<br/>Environmental context and resources<br/>Social influences<br/>Beliefs about consequences</i>       |
| Fares et al.       | Published | Egypt           | CS | HCWs                   | 385                        | Dec, 2020 - Jan, 2021 | 21%                        | <i>Social influences<br/>Social/professional role and identity<br/>Reinforcement</i>                                |

Behavioural determinants of COVID-19 vaccination acceptance among healthcare workers: a rapid review

|                          |           |           |    |                                 |       |                            |                                                                                                                      |                                                                              |
|--------------------------|-----------|-----------|----|---------------------------------|-------|----------------------------|----------------------------------------------------------------------------------------------------------------------|------------------------------------------------------------------------------|
| Alvarado-Socarras et al. | Published | Colombia  | CS | HCWs (physicians)               | 1,066 | Jan, 2021                  | Free vaccine that was 60% effective: acceptance rate=77%<br>Free vaccine that was 80% effective: acceptance rate=91% | <i>Social/professional role and identity<br/>Reinforcement</i>               |
| Konopińska et al.        | Published | Poland    | CS | HCWs (ophthalmology residents)  | 126   | Jan, 2021                  | 71%                                                                                                                  | <i>Beliefs about consequences</i>                                            |
| Hussein et al.           | Preprint  | Egypt     | CS | HCWs                            | 496   | Dec 1, 2020 - Jan 1, 2021  | 46%                                                                                                                  | <i>Beliefs about consequences<br/>Emotion</i>                                |
| Maraqqa et al.           | Published | Palestine | CS | HCWs                            | 1,159 | Dec 25, 2020 - Jan 6, 2021 | 38%                                                                                                                  | <i>Knowledge<br/>Social/professional role and identity<br/>Reinforcement</i> |
| Rabi et al.              | Published | Palestine | CS | HCWs (nurses)                   | 639   | Jan 1-7, 2021              | 40%                                                                                                                  | <i>Social influences<br/>Beliefs about consequences<br/>Emotion</i>          |
| Szmyd et al.             | Published | Poland    | CS | HCWs                            | 1,971 | Dec 22, 2020 - Jan 8, 2021 | 83%                                                                                                                  | <i>Beliefs about consequences<br/>Reinforcement<br/>Emotion</i>              |
| Yurttas et al.           | Published | Turkey    | CS | Gen pub, patient & HCWs samples | 320   | Jan 4-13, 2021             | 53%                                                                                                                  | <i>Emotion</i>                                                               |

Behavioural determinants of COVID-19 vaccination acceptance among healthcare workers: a rapid review

|                  |           |          |     |                                             |        |                            |     |                                                                                                             |
|------------------|-----------|----------|-----|---------------------------------------------|--------|----------------------------|-----|-------------------------------------------------------------------------------------------------------------|
| Nohl et al.      | Published | Germany  | CS  | HCWs (emergency medical services personnel) | 1,296  | Dec 4, 2020 - Jan 15, 2021 | 57% | <i>Social/professional role and identity</i>                                                                |
| Saied et al.     | Published | Egypt    | CS  | HCWs (medical students)                     | 2,133  | Jan 8-15, 2021             | 54% | <i>Knowledge<br/>Social/professional role and identity<br/>Beliefs about consequences<br/>Reinforcement</i> |
| Singhania et al. | Published | India    | CS  | HCWs                                        | 754    | Jan 20-24, 2021            | 80% | <i>Social influences<br/>Social/professional role and identity<br/>Beliefs about consequences</i>           |
| Huynh et al.     | Published | Vietnam  | CS  | HCWs                                        | 410    | Jan - Feb, 2021            | 76% | <i>Environmental context and resources<br/>Beliefs about consequences</i>                                   |
| Rehman et al.    | Preprint  | Pakistan | CS  | HCWs                                        | 436    | Jan 31 - Feb 9, 2021       | 60% | <i>Beliefs about consequences</i>                                                                           |
| Agyekum et al.   | Preprint  | Ghana    | CS  | HCWs                                        | 234    | Jan 16 - Feb 15, 2021      | 39% | <i>Social influences<br/>Social/professional role and identity<br/>Reinforcement</i>                        |
| Paris et al.     | Published | France   | CS  | HCWs                                        | 1,965  | Feb 9-18, 2021             | 73% | <i>Social/professional role and identity<br/>Beliefs about consequences<br/>Reinforcement</i>               |
| Woolf et al.     | Preprint  | UK       | Coh | HCWs                                        | 11,584 | Dec - Mar, 2021            | 77% | <i>Knowledge<br/>Social influences<br/>Beliefs about consequences<br/>Reinforcement</i>                     |

Behavioural determinants of COVID-19 vaccination acceptance among healthcare workers: a rapid review

|                |           |        |    |                        |     |                 |     |                                                 |
|----------------|-----------|--------|----|------------------------|-----|-----------------|-----|-------------------------------------------------|
| Kanyike et al. | Published | Uganda | CS | HCW (medical students) | 600 | Mar 15-21, 2021 | 37% | <i>Beliefs about consequences Reinforcement</i> |
|----------------|-----------|--------|----|------------------------|-----|-----------------|-----|-------------------------------------------------|

Notes: Greyed boxes in the data collection period column represent studies conducted from November 2020 onwards. Coh = cohort study; CS = cross-sectional survey; Gen pub = general public; HCW = healthcare worker; Qual = qualitative; TDF = Theoretical Domains Framework. \* = Verger et al. collected data from Canada, France, and Belgium so was included in both North America and rest-of-the-world sections.

PREPRINT
